# Supplementary material for: Climate change and the global pattern of moraine-dammed glacial lake outburst floods
Source: Copernicus journal article supplement (doi:10.5194/tc-12-1195-2018), 2018-04-09
Supplement: Supplementary file 1 [file tc-12-1195-2018-supplement.pdf]

Supplement of The Cryosphere, 12, 1195–1209, 2018  
<https://doi.org/10.5194/tc-12-1195-2018-supplement>  
© Author(s) 2018. This work is distributed under  
the Creative Commons Attribution 4.0 License.

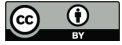

*Supplement of*

## **Climate change and the global pattern of moraine-dammed glacial lake outburst floods**

**S. Harrison et al.**

*Correspondence to:* Stephan Harrison ([stephan.harrison@exeter.ac.uk](mailto:stephan.harrison@exeter.ac.uk))

The copyright of individual parts of the supplement might differ from the CC BY 4.0 License.

1 Despite numerous inventories of Glacial Lake Outburst Floods (GLOFs) at regional scales, no global  
2 database has been created and analyzed to place GLOFs in their wider context. This means that we  
3 are unable to answer some important questions concerning their historical behaviour and therefore  
4 the changing magnitude and frequency of GLOFs globally through time, and their likely evolution  
5 under future global climate change. This latter point is made even more difficult by the lack of long-  
6 term climate data from many mountain regions. Given the size and impacts of GLOFs in many  
7 mountain regions, better understanding their links to present and future climate change is of great  
8 interest to national and regional governments, infrastructure developers and NGOs. There is  
9 currently also a strong focus on climate change adaptation, and glacial hazard research must now be  
10 seen through this lens.

11 As a result, the motivation for the paper is the widely held assumption that the magnitude and  
12 frequency of GLOFs in all glaciated mountain regions is increasing in response to global climate  
13 change. The logic supporting this is that recent climate change is driving mountain glacier recession  
14 (Fig. SI 1a,b) from their late Holocene moraine limits, this is contributing to the development of  
15 proglacial and supraglacial lakes and these eventually drain catastrophically following failure of  
16 moraine dams. We wished to test this assertion. Only GLOFs associated with collapse, breaching or  
17 overtopping of moraines damming glacial lakes were counted. Such events are generally triggered  
18 by ice and rock falls or rock slides into lakes creating seiche waves or displacement waves (Reynolds  
19 and Richardson 2000). While climate change plays a dominant role in the recession of glaciers,  
20 downwasting glacier surfaces debuttress valley rock walls leading to catastrophic failure (e.g. Jiang et  
21 al 2004). Other climatically induced triggers include: increased permafrost and glacier temperatures  
22 leading to failure of ice and rock masses into lakes and the melting of ice cores in moraine dams  
23 which leads to moraine failure and lake drainage. A methodologically sound detection and  
24 attribution study needs first to formulate a hypothesis of potential impact of climate change (Clague  
25 and Evans 2000). The reasoning supporting the association between climate change and GLOFs is  
26 that climate warming results in glacier recession and glacial lake formation and evolution behind  
27 moraine dams which become unstable and fail catastrophically.

28 GLOF database

29 As a result, we produce a database of GLOFs developed from a collation of regional inventories (e.g.  
30 GAPHAZ and GLACIORISK databases and the GLOF Database provided under ICL ) and reviews. Only  
31 those GLOFs that could be dated to a specific year were included.

32 Conclusions

33

34 Given the remote nature of many of the GLOF sites, the absence of remote sensing data from the  
35 early part of the record to corroborate GLOF observations and inconsistent use of lake, glacier,  
36 region or mountain names to describe GLOFs, these and other factors complicate the creation of  
37 GLOF inventories. We are aware that some GLOFs in the record may have been given different  
38 names by different authors in inventories and this could lead to confusion. When inventories are  
39 consolidated this might, on occasion, lead to double-counting. Similar issues represent a challenge  
40 for all Detection and Attribution research on individual climatic or earth system events. As a result,  
41 all such inventories are inherently uncertain. In our inventory for consistency we have kept all GLOF  
42 records as defined by the original authors. These may be subject to future change.

43

44 The takeaway points of this supplement, buttressing the points made in the main article, are that  
45 the timescales for the responses of debris-covered glaciers to climate change are long, and the  
46 limnological response timescales and GLOF trigger timescales are additional to that. Hence, climate  
47 changes that may spur lake development and outburst flooding may eventually manifest in GLOF  
48 activity a century or two centuries, or even longer, after the climatic perturbation. The GLOF record  
49 showing an upsurge in GLOF activity starting in the 1930-1950 timeframe thus probably represents a  
50 response to post-Little Ice Age warming rather than anthropogenic warming, and the decreased  
51 GLOF incidence starting late in the last century likely pertains to the stabilization of climate after the  
52 post-LIA warming but before anthropogenic warming started in earnest.

53

54 We emphasize that these results should not be construed as saying that anthropogenic climate  
55 change is somehow not affecting glacial lakes or not involved in the hazards due to them. Clearly,  
56 warming is occurring worldwide and must be affecting the growth rates of existing lakes and the  
57 inception of new ones, and some fraction—perhaps a small fraction at present—of GLOFs are  
58 triggered by recent climatic warming. We may infer that GLOF incidence rates are likely to increase  
59 later this century as anthropogenic warming takes an increasing toll on the health of glaciers  
60 worldwide.

61

62

63

#### 64 Supplementary Information File Figures

65 Figure SI 1a Changes in the length of 169 glaciers worldwide from the 18<sup>th</sup> to the 21<sup>st</sup> century (after  
66 Oerlemans 2005). Figure SI 1b: annual change in global glacier thickness (left axis, meters of water  
67 equivalent, m/yr) and cumulative value (right axis, m), based on surface area-weighted mass balance  
68 observations.

69

70

71 SI Table 1. Inventory of Glacial Lake Outburst Floods in mountain regions.

72

73 References for GLOF inventory (numbers refer to final column in SI Table)

1 GLACIORISK (2003) - <http://www.nimbus.it/glaciorisk/gridabasemainmenu.asp>Gridbase

2 GAPHAZ  
database<http://www.mn.uio.no/geo/english/research/groups/remotesensing/projects/gaphaz/>

3 WGMS (2008) <http://www.wgms.ch/>

4 Raymond, M., Wegmann, M. & Funk, M. Inventargefa"hrlicher Gletscher in der Schweiz. *Mitt. VAW/ETH* 182 (2003).

- 5 Ives, J.D., Shrestha, R.B., & Mool, P.K. Formation of glacial lakes in the Hindu Kush-Himalayas and GLOF risk assessment. Kathmandu: ICIMOD. (2010).
- 6 Reynolds, J.M. & Richardson, S., Geological Hazards – Glacial Natural Disaster Management. A presentation to commemorate the International Decade for Natural Disaster Reduction (IDNDR) 1990-2000 (2000).
- 7 Reynolds, J.M. The identification and mitigation of glacier-related hazards: examples from the Cordillera Blanca, Peru. *In: McCall, G.J.H., Laming, D.C.J. and Scott, S. (eds), Geo-hazards*, London, Chapman & Hall, pp. 143-157 (1992).
- 8 Database of glacier and permafrost disasters. University of Oslo: Department of Geosciences. (2013).
- 9 Reynolds, J.M. The development of a combined regional strategy for power generation and natural hazard risk assessment in a high-altitude glacial environment: an example from the Cordillera Blanca, Peru. *In: Merriman, P.A. and Browitt, C.W.A. (eds), Natural Disasters: protecting vulnerable communities*, London, Thomas Telford Ltd, pp. 38-50 (1993).
- 10 Ding, Y. & Liu, J. Glacier lake outburst flood disasters. *China Annals of Glaciology*, 16, 180–184 (1992).
- 11 Xu, D. Characteristics of debris flow caused by outburst of glacial lakes on the Boqu River in Xizang, China. *Journal of Glaciology and Geocryology*, 9( 1), 23-34 (1987).
- 12 RGSL. Ongoing efforts to detect, monitor and mitigate the effects of GLOFs in Nepal. Project No. J9622.021. (1997).
- 13 Costa, J.E., & Schuster, R.L. The formation and failure of natural dams. *Geological Society of America Bulletin*, 100, 1054-1068 (1988).
- 14 Clague J.J., Evans, S.G., & Blown, I.G. A debris flow triggered by the breaching of a moraine-dammed lake, Klattasine Creek, British Columbia. *Canadian Journal of Earth Sciences*, 22, p. 1492-1502 (1985).
- 15 Clague, J.J. & Evans, S.G. (2000) A review of catastrophic drainage of moraine-dammed lakes in British Columbia, *Quaternary Science Reviews* 19, 1763-1783, (2000)
- 16 O'Connor, J.E., Hardison, J.H., & Costa, J.E. Debris flows from failures of Neoglacial- age moraines in the Three Sisters and Mount Jefferson wilderness areas, Oregon. US 1803 *Geological Survey Professional Paper* 1606 (2001).
- 17 RGSL. Glacial hazard assessment for the Upper Indus Basin, Pakistan, J02134 (2002).

18 Zapata, M.L. La dinamica glaciaria en lagunas de la Cordillera Blanca. *Acta Montana*, 19 (123), 37-60 (2002).

19 Jiang, Z.X., Cui, P., & Jiang, L.W., Critical hydrologic conditions for overflow burst of moraine lake. *Chinese Geographical Science*, 14 (1), 39–47 (2004).

20 Carey, M. Living and dying with glaciers: people's historical vulnerability to avalanches and outburst floods in Peru. *Global and Planetary Change* 47, 122-134, (2005)

21 Kershaw JA, Clague JJ, Evans, S.G. Geomorphic and sedimentological signature of a two-phase outburst flood from moraine-dammed Queen Bess lake, British Columbia, Canada. *Earth Surface Processes and Landforms*, 30, 1-25 (2005)

24 Narama, C., Severskiy, I., and Yegorov, A. Current state of glacier changes, glacial lakes, and outburst floods in the Ile Ala-Tau and Kungoy Ala-Too ranges, northern Tien Shan Mountains, *Annals of Hokkaido Geography*, 84, (2010)

25 Wang, S., Zhang, M., Li, Z., Wang, F., Li, H., Li, Y. & Huand, X. Glacier area variation and climate change in the Chinese Tianshan Mountains since 1960. *Journal of Geographical Sciences*, 21 263-273 (2011)

26 Worni, R., Stoffel, M., Huggel, C., Volz, C., Casteller, A. & Luckman, B. Analysis and dynamic modeling of a moraine failure and glacier lake outburst flood at Ventisquero Negro, Patagonian Andes (Argentina). *Journal of Hydrology* 444/445, 134–145 (2012).

27 Fujita, K, Sakai, A, Nuimura, T, Yamaguchi, S & Sharma, RR Recent changes in Imja glacial lake and its damming moraine in the Nepal Himalaya revealed by in situ surveys and multi-temporal ASTER imagery. *Environmental Research Letter* 4 045205 (2012).

28 Carey, M., Huggel, C., Bury, J., Portocarrero C., & Haeberli W. An Integrated Socio-Environmental Framework for Glacier Hazard Management and Climate Change Adaptation: Lessons from Lake 513, Cordillera Blanca, Peru, *Climatic Change* 112, nos. 3-4, 733-767 (2011).

29 Mergili, M. & Schneider, J.F., Regional-scale analysis of lake outburst hazards in the southwestern Pamir, Tajikistan, based on remote sensing and GIS, *Natural Hazards and Earth System Sciences*, 11, 1447-1462,(2011).

30 Iribarren Anaconda, P., Mackintosh, A. & Norton, K.P. Hazardous processes and events from glacier and permafrost areas: lessons from the Chilean and Argentinean Andes. *Earth Surface Earth Surface Processes and Landforms* (2014) DOI: 10.1002/esp.3524

31 URL: [http://eprints.ucm.es/14013/1/MASTER\\_PROJECT\\_ClaudiaGiraldez.pdf](http://eprints.ucm.es/14013/1/MASTER_PROJECT_ClaudiaGiraldez.pdf)

32 Osti, R. and Egashira, S. Hydrodynamic characteristics of the Tam Pokhari Glacial Lake outburst flood in the Mt. Everest region, Nepal. *Hydrological Processes*, 23, 2943–2955 (2009).

33 RGSL. J9622.021. Ongoing efforts to detect, monitor and mitigate the effects of GLOFs in Nepal. (1997).

34 Emmer, A., Vilimek, V., Klimes, J., & Cochachin, A. Glacier retreat, lakes development and associated natural hazards in Cordillera Blanca, Peru. In: *Landslides in cold regions in context of climate change*. Springer, 231-250 (2014).

74

75

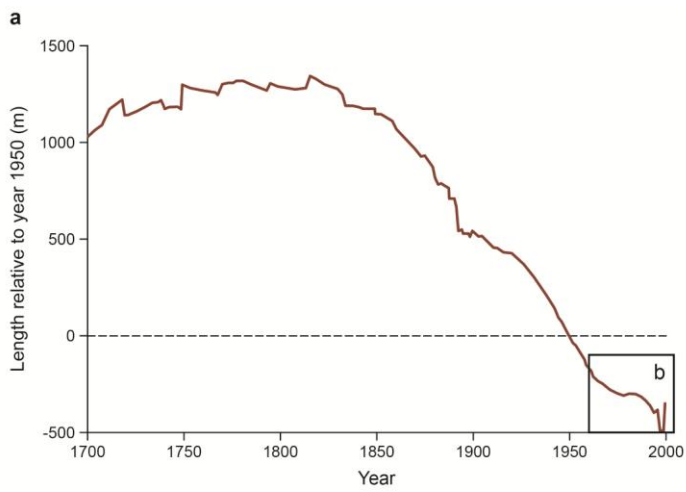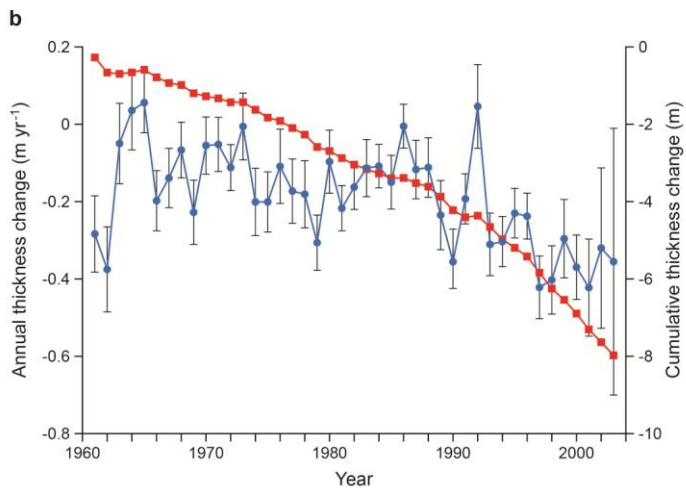

| Political Unit                  | Site               | Lake Name    | Glacier or Mountain Name | Latitude | Longitude | Mth | Yr   | Outburst Vol (M cumecs) | Peak Q cumecs | Probable trigger                   | Damage                                                                            | Ref.  |
|---------------------------------|--------------------|--------------|--------------------------|----------|-----------|-----|------|-------------------------|---------------|------------------------------------|-----------------------------------------------------------------------------------|-------|
| <b>Europe + European Russia</b> |                    |              |                          |          |           |     |      |                         |               |                                    |                                                                                   |       |
| AT                              | Ötztaler_Alps      |              | Gallruttferner           | 47.05    | 10.78     |     | 1890 |                         |               |                                    |                                                                                   | 1     |
| AT                              | Eastern_Alps       | Preiml       | Hochalmkees              | 47.02    | 13.33     | 10  | 1932 | 0.30                    |               | Ice avalanche                      | One wooden bridge was destroyed as well as pasture land, alpine tracks and wood.  | 1     |
| AT                              | Ötztaler_Alps      |              | Winnebachferner          | 47.10    | 11.05     |     | 1940 |                         |               |                                    |                                                                                   | 1     |
| CH                              | Western_Alps       | Nr_3         | Gruben                   | 46.17    | 7.97      | 8   | 1958 |                         |               |                                    | No damage                                                                         | 4     |
| CH                              | Western_Alps       | Nr_3         | Gruben                   | 46.17    | 7.97      | 7   | 1968 | 0.17                    |               | Subglacial discharge               |                                                                                   | 3,4   |
| CH                              | Western_Alps       |              | Sidelen                  | 46.50    | 8.42      | 8   | 1987 |                         |               | Heavy rainfall                     | Alps and a street in the Gerental were damaged.                                   | 4     |
| CH                              | Western_Alps       |              | Dolent                   | 45.92    | 7.07      | 7   | 1990 | 0.03                    |               |                                    |                                                                                   | 2     |
| CH                              | Western_Alps       | Sirwolte     | Griessernuhorn           | 46.21    | 7.99      | 9   | 1993 | 0.30                    | 90.00         | Heavy rainfall                     | 10-20m high moraine breach, damage on Simplon highway, destroyed gauge station.   | 2     |
| FR                              | Mont_Blanc_Massif  |              | Nantillons               | 45.90    | 6.90      | 9   | 1944 |                         |               | Rapid discharge in proglacial lake | Houses in Chamonix flooded, and Montenvers railway track damaged.                 | 1     |
| IT                              | Piemonte           | Galambra     | Galambra                 | 45.11    | 6.85      |     | 1932 | 0.50                    |               |                                    | No damage                                                                         | 1     |
| IT                              | Piemonte           |              | Gemelli_dj_Ban           | 46.40    | 8.35      | 10  | 1971 |                         |               |                                    | No damage                                                                         | 1     |
| IT                              |                    |              | Mulinet S                | 45.02    | 7.17      | 9   | 1993 |                         |               |                                    |                                                                                   | 2     |
| IT                              |                    |              | Sissone                  | 46.12    | 9.73      |     | 1950 |                         |               |                                    |                                                                                   |       |
| IT                              | Aosta_Valley       |              | Trajo                    | 45.61    | 7.27      |     | 1870 |                         |               |                                    |                                                                                   | 2     |
| <b>Hindu Kush Himalaya</b>      |                    |              |                          |          |           |     |      |                         |               |                                    |                                                                                   |       |
| BT                              | Himalaya           |              | Unnamed                  |          |           |     | 1950 |                         |               |                                    | Destroyed part of Punakha Dzong.                                                  | 3     |
| BT                              | Himalaya           | Tarina       |                          | 28.11    | 89.90     |     | 1957 |                         |               |                                    | Destroyed part of Punakha Dzong.                                                  | 3,5   |
| BT                              | Himalaya           | Tarina       |                          | 28.11    | 89.90     |     | 1959 |                         |               |                                    | Damaged half of Punakha Dyong                                                     | 33    |
| BT                              | Himalaya (Pho Chu) | Unnamed      |                          |          |           |     | 1960 |                         |               |                                    |                                                                                   | 5     |
| BT                              | Himalaya           | Bachamancha  | Bachamancha              | 28.03    | 90.68     |     | 1960 |                         |               |                                    |                                                                                   | 5     |
|                                 | Himalaya           |              | Unnamed                  |          |           |     | 1968 |                         |               |                                    | Several houses, Punakha valley temple and Wangdi                                  | 3     |
| BT                              | Lunana_Basin       | Lugge        | Lugge                    | 28.09    | 90.29     | 10  | 1994 | 28.00                   | 2500.00       |                                    | 26 people died & significant property damage                                      | 2,5   |
| BT                              | Lunana_Basin       |              |                          |          |           |     | 1996 | 45.00                   |               | Moraine dam breach                 | 27 dead. Floodwave of 2 m at 200km from source.                                   | 6     |
| BT                              | Lunana_Basin       | Lugge        | Lugge                    | 28.09    | 90.29     | 4   | 2009 | 1.50                    |               |                                    |                                                                                   | 27    |
| CN                              | Tibet              | Zhanlonba    |                          |          |           |     | 1902 |                         |               |                                    |                                                                                   | 10    |
| CN                              | Tibet              | Tara         |                          | 28.29    | 86.13     | 8   | 1935 | 0.60                    |               | Ice avalanche                      | 66700m <sup>2</sup> of wheat fields, livestocks and others damaged.               | 5     |
| CN                              | Tibet              | Qiongbixia   |                          | 27.83    | 88.91     | 7   | 1940 |                         |               | Ice avalanche                      | Water level of Xiasim, Yadong rose 4-5m, streets flooded                          | 3     |
| CN                              | Tibet              | Sangwang     |                          | 28.23    | 90.10     | 7   | 1954 | 5.00                    |               | Ice avalanche                      | 400 deaths in cities of Gyangze and Xigaze 200km                                  | 3,5   |
| CN                              | Tibet              |              | Tara Cho (Boqu River)    | 28.28    | 86.13     | 7   | 1964 |                         |               | Piping and moraine failure         |                                                                                   | 10    |
| CN                              | Tibet              | Damenhai     | Damenhai                 | 29.93    | 93.15     | 9   | 1964 | 0.20                    | 2812.00       | Rock avalanche                     | Blocked Nyang River for >10hrs, damaged houses and highway.                       | 3,5   |
| CN                              | Tibet              | Gelhaipu     | Gelhaipu                 | 27.96    | 87.81     | 9   | 1964 | 23.36                   |               | Heavy rainfall                     | Casualties and heavy economic loss including to Chentang-                         | 3,5   |
| CN                              | Tibet              | Zhangzhangbo |                          | 28.06    | 86.06     | 9   | 1964 | 19.00                   | 15920.00      |                                    | No damage                                                                         | 5     |
| CN                              | Tibet              | Longda       |                          | 28.61    | 85.34     | 8   | 1964 | 0.50                    |               | Ice avalanche                      |                                                                                   | 5     |
| CN                              | Tibet              | Jilai        |                          |          |           | 9   | 1964 | 0.50                    |               | Ice avalanche                      |                                                                                   | 19    |
| CN                              | Tibet              | Aya          |                          | 28.34    | 86.49     | 8   | 1965 |                         |               | Ice avalanche                      | Road, bridges and others damaged.                                                 | 5     |
| CN                              | Tibet              | Longda       |                          | 28.61    | 85.34     | 8   | 1968 |                         |               | Ice avalanche                      |                                                                                   | 3     |
| CN                              | Tibet              | Damenhai     | Damenhai                 | 29.93    | 93.15     | 8   | 1968 |                         |               | Ice avalanche                      |                                                                                   | 3     |
| CN                              | Tibet              | Aya          |                          | 28.34    | 86.49     | 8   | 1968 |                         |               | Ice avalanche                      | Damaged highway and bridge of Desha.                                              | 3     |
| CN                              | Tibet              | Aya          |                          | 28.34    | 86.49     | 8   | 1969 |                         |               | Ice avalanche                      | Damaged highway and bridge of Desha.                                              | 3     |
| CN                              | Tibet              | Aya          |                          | 28.34    | 86.49     | 8   | 1970 | 5.00                    |               |                                    | Flood damaged the highway and concrete bridges of                                 | 2,5   |
| CN                              | Tibet              | Qiongbixiama |                          | 27.83    | 88.91     | 7   | 1970 |                         |               |                                    |                                                                                   | 3     |
| CN                              | Tibet              | Bugyai       |                          | 31.77    | 94.81     | 7   | 1972 |                         |               | Ice avalanche                      |                                                                                   | 10    |
| CN                              | Tibet              | Poge         |                          |          |           | 7   | 1972 |                         |               | Ice avalanche                      |                                                                                   | 5     |
| CN                              | Tibet              | Zhari        |                          |          |           | 6   | 1981 |                         |               | Ice avalanche                      |                                                                                   | 5     |
| CN                              | Tibet              | Zhangzangbo  |                          | 28.06    | 86.06     | 7   | 1981 | 19.00                   | 15920.00      | Glacier_avalanche                  | Damaged highway, bridge, hydropower station and                                   | 5, 11 |
| CN                              | Tibet              | Jzierma      |                          | 28.08    | 86.07     | 7   | 1981 |                         |               | Ice avalanche                      |                                                                                   | 10    |
| CN                              | Tibet              | Jin          |                          | 28.00    | 87.16     | 8   | 1982 | 0.50                    |               | Ice_avalanche                      | >1600 livestock and 280 cultivated fields lost. Houses in eight villages damaged. | 5     |
| CN                              | Tibet              | Gule         |                          | 29.50    | 94.50     | 7   | 1988 |                         |               | Ice avalanche                      |                                                                                   | 10    |



|                               |                          |                |                   |       |         |     |      |       |          |                      |                                                                              |       |
|-------------------------------|--------------------------|----------------|-------------------|-------|---------|-----|------|-------|----------|----------------------|------------------------------------------------------------------------------|-------|
| CN                            | Tibet                    | Mitui          |                   |       |         | 7   | 1988 | 0.01  | 1250.00  | Ice avalanche        |                                                                              | 10    |
| CN                            | Tibet                    | Guangxie       |                   |       |         | 7   | 1988 | 0.30  |          | Ice avalanche        |                                                                              | 19    |
| CN                            | Tibet                    | Zana           | Trisuli           | 28.66 | 85.37   | 6   | 1995 |       |          |                      | Destroyed 28km road.                                                         | 5     |
| CN                            | Tibet                    |                | Degapu            |       |         | 9   | 2002 |       |          | Ice avalanche        |                                                                              | 25    |
| CN                            | Tibet                    |                | Zhemalco          |       |         | 7   | 2009 |       |          | Ice avalanche        |                                                                              | 25    |
| CN                            | Tibet                    |                | Cliao             |       |         | 7   | 2009 |       |          | Ice avalanche        |                                                                              | 25    |
| PK                            |                          |                |                   |       |         |     | 1878 |       | 18700 m3 |                      |                                                                              | 17    |
| PK                            | Karakoram                | Karambar       | Karambar          | 36.62 | 74.18   | 6   | 1905 |       |          |                      | Damage to villages above the Gilgit. Some bridges in Gilgit                  | 2     |
| PK                            | Karakoram                |                |                   |       |         | 6   | 1967 |       |          |                      |                                                                              | 17    |
| PK                            | Karakoram                |                | Batura            |       |         |     | 1972 |       |          |                      |                                                                              | 17    |
| PK                            | Karakoram                |                | Balt Bare         |       |         | Spr | 1974 | 5.00  | 63cumecs |                      | Killed 1 person. Destroyed 120m bridge, part of KH.                          | 17    |
| NP                            |                          |                |                   |       |         |     | 1964 |       |          |                      |                                                                              | 12    |
| NP                            | Khumbu_Himal             | Nare           | Nare              | 27.82 | 86.84   | 9   | 1977 | 5.00  | 1200.00  | Melting of ice cored | 3 people killed. Damage to HE, road, houses. Bridges                         | 12    |
| NP                            | Khumbu_Himal             | Nagma          |                   | 27.86 | 87.86   | 6   | 1980 |       |          | Moraine collapse     | Destroyed villages 71km from source and forest.                              | 12    |
| NP                            | Khumbu_Himal             |                |                   |       |         | 7   | 1985 |       |          |                      |                                                                              | 12    |
| NP                            | Khumbu_Himal             | Dig            | Langmoche         | 27.87 | 86.58   | 8   | 1985 | 6.00  | 1600.00  | Ice avalanche        | Four or five people killed. Damage to houses, HEP,                           | 1, 2  |
| NP                            | Khumbu_Himal             | Chubung        | Ripimosar         | 27.87 | 86.45   | 7   | 1991 | 1.00  |          | Ice avalanche        | Na livestock killed, bridge destroyed. Beding 1 fatality, flour              | 2, 5  |
| NP                            | Khumbu_Himal             | NA             | Amadablam         | 27.81 | 86.85   |     | 1993 |       |          | Ice avalanche        | Loss of livestock and farmland and two people died.                          | 2,5   |
| NP                            | Khumbu_Himal             | Tam            | Sabai             | 27.74 | 86.84   | 9   | 1998 | 17.00 | 30000.00 | Ice avalanche        | Numerous fatalities and widespread damage. Damage cost around 2 million USD. | 5     |
| NP                            | Manaslu_Himal            | Kabache        |                   | 28.45 | 84.13   | 8   | 2003 |       |          | Moraine collapse     |                                                                              | 5     |
| NP                            | Manaslu_Himal            | Kabache        |                   | 28.45 | 84.13   | 8   | 2004 |       |          |                      |                                                                              | 5     |
| NP                            | Himalaya                 |                | Unnamed           | 30.26 | 81.46   | 6   | 2011 |       |          | Ice avalanche        | Damaged farmland.                                                            | 3,5   |
| North America (mainly Alaska) |                          |                |                   |       |         |     |      |       |          |                      |                                                                              |       |
| CA                            | British_Columbia         | Tide           | Frank_Mackie      |       |         |     | 1929 |       |          | Meltwater incision   |                                                                              | 15    |
| CA                            | British_Columbia         | South_Macoun   |                   |       |         |     | 1949 | 0.40  | 1000.00  |                      |                                                                              | 15    |
| CA                            | British_Columbia         |                |                   |       |         |     | 1965 |       |          |                      |                                                                              |       |
| CA                            | British_Columbia         |                | Bridge            |       |         |     | 1967 | 2.00  | 1000.00  |                      |                                                                              | 15    |
| CA                            | British_Columbia         | Klattasine     | Homathko_Icefield | 51.17 | -124.75 |     | 1972 | 1.70  | 1000.00  | Heavy rainfall       |                                                                              | 14    |
| CA                            | British Columbia         | Cathedral      |                   |       |         |     | 1978 |       |          |                      |                                                                              |       |
| CA                            | British Columbia         | Flood lake     |                   |       |         |     | 1979 |       |          |                      |                                                                              |       |
| CA                            | British Columbia         | Peyto          |                   |       |         |     | 1983 |       |          |                      |                                                                              |       |
| CA                            | British Columbia         | Flood lake     |                   |       |         |     | 1983 |       |          |                      |                                                                              |       |
| CA                            | British Columbia         | North_Macoun   |                   |       |         | 7   | 1983 |       |          |                      |                                                                              | 15    |
| CA                            | British Columbia         | Nostetuko      | Cumberland        | 51.20 | -124.40 | 7   | 1983 | 6.50  | 900.00   | Ice avalanche        | Two gauging stations on Nostetuko River damaged.                             | 2, 3  |
| CA                            | British Columbia         | Flood lake     |                   |       |         |     | 1984 |       |          |                      |                                                                              |       |
| CA                            | British Columbia         | Fyles          |                   |       |         |     | 1984 |       |          |                      |                                                                              |       |
| CA                            | British Columbia         | Tats           |                   |       |         | 6   | 1990 | 0.00  |          | Heavy rainfall       |                                                                              | 15    |
| CA                            | British Columbia         | Queen_Bess     | Diadem            | 51.25 | -124.51 | 8   | 1997 | 8.00  | 1000.00  | Rainfall             | Floodwater eroded Quaternary deposits, damaged                               | 2, 21 |
| US                            | Cascade_Range            | NA             | Eugene            | 44.11 | -121.78 | 8   | 1933 |       | 350.00   |                      |                                                                              | 16    |
| US                            | Cascade_Range            | Jefferson Park | NA                |       |         | 8   | 1934 | 0.01  | 600.00   | Rapid ice melt       |                                                                              | 16    |
| US                            | Cascade_Range            |                | Waldo             | 44.66 | -121.79 |     | 1937 |       |          |                      |                                                                              | 16    |
| US                            | Sierra_Nevada_California |                | Conness           | 37.96 | -119.31 |     | 1939 |       |          |                      |                                                                              | 16    |
| US                            | Cascade_Range            |                | Eugene            | 44.11 | -121.78 |     | 1941 |       |          |                      |                                                                              | 16    |
| US                            | Cascade_Range            |                |                   | 44.12 | -121.82 | 7   | 1942 |       | 360.00   |                      |                                                                              | 13    |
| US                            | Cascade_Range            |                | Collier           | 44.16 | -121.77 | 7   | 1942 | 0.46  | 545.00   |                      |                                                                              | 16    |
| US                            | Cascade_Range            |                | Waldo             | 44.66 | -121.79 | 7   | 1951 |       |          |                      |                                                                              | 16    |
| US                            | Cascade_Range            |                |                   | 48.40 | -121.27 |     | 1955 | 0.20  |          |                      |                                                                              | 16    |
| US                            | Cascade_Range            |                |                   |       |         |     | 1957 | 0.00  | 300.00   |                      |                                                                              | 16    |
| US                            | Cascade_Range            |                |                   | 44.46 | -121.83 |     | 1960 | 0.01  |          |                      |                                                                              | 16    |
| US                            | Cascade_Range            |                |                   | 44.08 | -121.68 | 10  | 1966 | 0.32  | 380.00   | Ice avalanche        |                                                                              | 13    |
| US                            | Cascade_Range            |                |                   |       |         | 9   | 1970 | 0.33  | 297.00   |                      |                                                                              | 13    |
| US                            | Cascade_Range            |                | Diller            | 44.14 | -121.77 | 9   | 1970 | 0.32  | 490.00   |                      |                                                                              | 16    |
| US                            |                          |                |                   |       |         |     | 1980 |       |          |                      |                                                                              |       |
| US                            | Cascade_Range            |                |                   | 44.46 | -121.83 |     | 1984 | 0.01  |          |                      |                                                                              | 16    |
| US                            | Alaska                   | Peters         |                   |       |         |     | 1986 |       |          |                      |                                                                              |       |
| US                            | Alaska                   | Hubbard        |                   |       |         | 5   | 1986 |       |          |                      |                                                                              |       |
| US                            | Alaska                   | Hubbard        |                   |       |         | 10  | 1988 |       |          |                      |                                                                              |       |
| US                            | Alaska                   | Black Rapids   |                   |       |         | 11  | 2002 |       |          |                      |                                                                              |       |

|                                |                           |                        |                         |          |           |     |      |            |          |                         |                                                          |           |
|--------------------------------|---------------------------|------------------------|-------------------------|----------|-----------|-----|------|------------|----------|-------------------------|----------------------------------------------------------|-----------|
| MX                             |                           |                        | Popocatepetl            |          |           | 1   | 2001 |            |          |                         |                                                          | 8         |
| South American Andes           |                           |                        |                         |          |           |     |      |            |          |                         |                                                          |           |
| CL                             |                           | Lago Plomo             |                         | -33.12   | -70.03    |     | 1984 |            |          |                         |                                                          | 8         |
| CL                             | Patagonia                 |                        | Rio Leones              |          |           |     | 2000 |            |          |                         |                                                          | 30        |
| CL                             | Patagonia                 |                        | Rio Engano              |          |           | 7   | 1955 |            |          |                         |                                                          | 30        |
| CL                             | Patagonia                 |                        | Glaciar Piedras Blancas |          |           | 12  | 1913 |            |          |                         |                                                          | 30        |
| CL                             | Patagonia                 |                        | Rio Engano              |          |           | 4   | 1976 |            | 7.36     |                         |                                                          | 30        |
| CL                             |                           |                        | Tronquitos              | -28.53   | -69.72    |     | 1985 |            |          |                         | Glacier flood                                            | 8         |
| CL                             | Patagonia                 | Laguna del Cerro Largo | Soler                   | -46.91   | -73.15    | 3   | 1989 | 229.00     |          | Meltwater discharge     | No damage                                                | 30        |
| CL                             | Patagonia                 |                        | Rio Lacaya              |          |           |     | 2000 |            | 3.14     |                         |                                                          | 30        |
| CL                             | North Patagonian Icefield | Calafate               |                         |          |           | 12  | 2000 | 2.00       |          | Rock avalanche          |                                                          | 22        |
| CL                             | Patagonia                 |                        | Glaciar Olvidado        |          |           |     | 2003 |            |          |                         |                                                          | 30        |
| CL                             | Patagonia                 | Ventisquero Negro      |                         | -41.20   | -71.82    | 5   | 2009 | 10.00      | 4100.00  | High precipitation      |                                                          | 26, 30    |
| CO                             |                           | Lagunillas             |                         | 4.88     | -75.30    |     | 1995 |            |          |                         |                                                          | 8         |
| PE                             | Cordillera_Blanca         | Rajururi               | Huandoy                 |          |           | 1   | 1725 |            |          | earthquake /            | destruction of Ancash village                            | 35        |
| PE                             | Cordillera_Huayhuash      |                        |                         |          |           | 2   | 1869 |            |          |                         | Destroyed several houses                                 | 7         |
| PE                             | Cordillera_Blanca         | Rajucolta              |                         | -9.52    | -77.34    | 6   | 1883 |            |          |                         | Many fatalities. Destroyed schools, houses and cemetery. | 18, 35    |
| PE                             | Cordillera_Huayhuash      |                        |                         |          |           | 2   | 1911 |            |          |                         | Destroyed a small village                                | 7         |
| PE                             | Cordillera_Blanca         |                        | Huascaran Norte         | -9.10    | -77.62    | 1   | 1917 |            |          |                         |                                                          | 7         |
| PE                             | Cordillera_Huayhuash      | Soltera                | Solteracocho            | -10.23   | -76.93    | 3   | 1932 |            |          |                         | No damage                                                | 2         |
| PE                             | Cordillera_Blanca         | Magistral              |                         |          |           |     | 1938 |            |          |                         | 32 houses and 13 bridges destroyed.                      | 18        |
| PE                             | Cordillera_Blanca         | Artesa                 | Paclashcocha            | -9.11    | -77.51    | 1   | 1938 | 0.50       |          | Ice avalanche           | No damage                                                | 2, 35     |
| PE                             | Cordillera_Blanca         | Unnamed                | Q. Ulta                 |          |           | 4   | 1939 | 0.01       |          |                         |                                                          | 16, 35    |
| PE                             | Cordillera_Huayhuash      | Suero                  |                         | -10.63   | -76.69    | 4   | 1941 | 8.0 - 11.0 |          |                         | Damaged farmland.                                        | 18        |
| PE                             | Cordillera_Blanca         | Palcacocha             |                         | -9.39    | -77.38    | 12  | 1941 | 4.00       |          | Ice avalanche / piping- | Approximately 6000 people died in Huaraz and part of the | 2, 35     |
| PE                             | Cordillera_Blanca         | Ayhuiñaraju            | Huantsan                | -9.51    | -77.31    | 1   | 1945 | 0.86       | 14000.00 | ice-rock avalanche      | 500 people died and damage to archaeological sites.      | 2, 35     |
| PE                             | Cordillera_Blanca         | Jancarurish            | Kogan                   | -8.85    | -77.67    | 10  | 1950 | 2.0 - 10   | 8000.00  | Ice avalanche           | About 500 people were killed.                            | 2, 35     |
| PE                             | Cordillera_Blanca         | Chacrucocha            |                         |          |           |     | 1945 | 0.30       |          |                         |                                                          | 16, 35    |
| PE                             | Cordillera_Blanca         | Artesoncocha           | Caraz                   | -8.97    | -77.64    | 7   | 1951 | 1.13       |          | Ice avalanche           | No damage                                                | 2, 35     |
| PE                             | Cordillera_Blanca         | Artesoncocha           | Caraz                   | -8.97    | -77.64    | 10  | 1951 | 2.8 - 3.52 |          | ice avalanche           | No damage                                                | 2, 35     |
| PE                             | Cordillera_Blanca         | Milluacocho            |                         | -8.79    | -77.70    | 11  | 1952 | 0.03-0.05  |          |                         | Little damage.                                           | 7, 18, 35 |
| PE                             | Cordillera_Huayhuash      |                        |                         |          |           | 3   | 1953 |            |          |                         | Destruction of three hamlets and one town; many deaths   | 7, 18     |
| PE                             | Cordillera_Blanca         | Tullparaju             |                         | -9.16    | -77.55    | 3   | 1953 | 3.10       |          | landslide in moraine    |                                                          | 31, 35    |
| PE                             |                           |                        | Glaciar 511             | -9.11    | -77.64    |     | 1962 |            |          | Ice avalanche           |                                                          | 8         |
| PE                             |                           |                        | Glaciar 511             | -9.11    | -77.64    |     | 1970 |            |          |                         |                                                          | 8         |
| PE                             |                           | Laguna Yanahuin        |                         |          |           | 3   | 1971 |            |          | Rock Avalanche          | A mining camp destroyed resulting in 400-600 deaths.     | 7         |
| PE                             | Cordillera_Blanca         | Tumarina               |                         | -9.49    | -77.34    | 12  | 1965 |            |          | Ice avalanche           | 10 fatalities. Two houses and a path destroyed.          | 18, 35    |
| PE                             | Cordillera_Blanca         | Yanaraju               |                         |          |           | 5   | 1970 |            |          | earthquake /            |                                                          | 18, 35    |
| PE                             | Cordillera_Blanca         | Safuna_Alta            | Pucajirca               | -8.84    | -77.62    | 6   | 1970 | > 4,0      |          | Earthquake-triggered    |                                                          | 13, 35    |
| PE                             | Cordillera_Huayhuash      | Sarapococha            |                         |          |           | 2   | 1981 |            |          |                         | Highway, bridge and Cajatambo area damaged.              | 31        |
| PE                             | Cordillera_Blanca         | Unnamed                | Q. Artizon              | -8.94    | -77.61    | 5   | 1997 |            |          | landslide in moraine    | Santa Cruz trail damaged and Huaylas area damaged.       | 31, 35    |
| PE                             |                           | Salcantay              |                         |          |           |     | 1998 |            |          | Glacier flood           |                                                          | 8         |
| Central Asia (mainly Pamir and |                           |                        |                         |          |           |     |      |            |          |                         |                                                          |           |
| KZ                             | Zailiskiy Alatau          | Malaya Almatinka       |                         |          |           | Sum | 1944 |            |          |                         |                                                          | 23        |
| KZ                             | Zailiskiy Alatau          | Malaya Almatinka       |                         |          |           | Sum | 1951 |            |          |                         |                                                          | 23        |
| KZ                             | Zailiskiy Alatau          | Malaya Almatinka       |                         |          |           | Sum | 1956 |            |          |                         |                                                          | 23        |
| KZ                             |                           | Issyk                  |                         | 43.19    | 77.53     | Sum | 1958 |            |          |                         |                                                          | 23        |
| KZ                             |                           | Akkul                  |                         |          |           | 7   | 1963 |            |          |                         |                                                          | 16        |
| KZ                             | Talgar                    |                        | Glacier 151             | 43.12    | 77.34     | 7   | 1970 |            |          |                         |                                                          | 24        |
| KZ                             | Talgar                    |                        | Glacier 151             | 43.12    | 77.34     | 7   | 1971 |            |          |                         |                                                          | 24        |
| KZ                             | Tuyuksu                   |                        | Tuyuksu Glacier         | 43.05    | 77.08     | 7   | 1973 | 0.35       |          |                         |                                                          | 24        |
| KZ                             | Talgar                    |                        | Glacier 182             | 43.12    | 77.34     | 7   | 1974 |            |          |                         |                                                          | 24        |
| KZ                             | Zailiskiy Alatau          | Bolshaya Almatinka     |                         | c.43.070 | c. 76.988 | Sum | 1975 |            |          |                         |                                                          | 23        |
| KZ                             | Kombelsu                  |                        | Glacier 117             |          |           | 8   | 1975 |            |          |                         |                                                          | 24        |
| KZ                             | Zharsai                   |                        | Glacier 205             |          |           | 7   | 1977 |            |          |                         |                                                          | 24        |
| KZ                             |                           | Moraine_Lake_No_13     |                         |          |           | 8   | 1977 | 0.00       | 11000.00 |                         |                                                          | 16        |
| KZ                             | Talgar                    |                        |                         | -43.12   | 77.34     | Sum | 1979 |            |          |                         |                                                          | 23        |
| KZ                             | Kaskelen                  |                        | Glacier 35              |          |           | 7   | 1980 |            | 30000.00 |                         |                                                          | 24        |
| KZ                             | Talgar                    |                        |                         | -43.12   | 77.34     | Sum | 1993 |            |          |                         |                                                          | 23        |
| KZ                             | Zailiskiy Alatau          | Bolshaya Almatinka     |                         | 43.07    | 76.99     | Sum | 1994 |            |          |                         |                                                          | 23        |
| KZ                             |                           |                        | Archa-Bashy lake        |          |           |     | 1998 |            |          |                         |                                                          |           |

|     |                |        |                  |  |     |      |      |  |                          |    |
|-----|----------------|--------|------------------|--|-----|------|------|--|--------------------------|----|
| KYZ | Teskey Ala-Too | Zyndan |                  |  | 7   | 2008 | 0.44 |  |                          | 24 |
| KYZ | Pamir          |        | Shakdhara Valley |  | Sum | 2002 | 0.25 |  | Drainage of supraglacial | 29 |

KEY

- AR=Argentina
- AT=Austria
- BO=Bolivia
- BT=Bhutan
- CA=Canada
- CH=Switzerland
- CL=Chile
- CN=China
- CO=Colombia
- FR=France
